# Supplementary material
Source: MDPI journal article supplement (https://www.mdpi.com/2075-163X/12/9/1179)
Supplement: s1 [file s1]

Supplementary:

**Table S1.** Phase contents determined by XRD and Rietveld refinement. E.s.d.s of the refinement are given in parentheses. Additional phase contents are ≤1.5 wt. %: Anhydrite and brownmillerite; ≤1 wt. %: Rondorfite, CaCl<sub>2</sub> and albite; ≤0.5 wt. %: microcline, CaSiO<sub>3</sub>Cl<sub>2</sub> and ye’elimite.

| Name        | amorphous | β-C <sub>2</sub> S | αH-C <sub>2</sub> S | γ-C <sub>2</sub> S | Quartz  | CaCO <sub>3</sub> | Lime    | Elles-tadite | mkI     | tadite  | Chlor-mayenite | Rusi-novite | Terne-site | Spurrite | Ranki-nit | Melilite | Bredigite | Mer-winite | Wollastonite | GoF  | DW   |
|-------------|-----------|--------------------|---------------------|--------------------|---------|-------------------|---------|--------------|---------|---------|----------------|-------------|------------|----------|-----------|----------|-----------|------------|--------------|------|------|
|             |           |                    |                     |                    |         |                   |         | Elles-hex    |         |         |                |             |            |          |           |          |           |            |              |      |      |
| HT[P]_800   | 20(1)     | 2.9(3)             | 7.3(3)              | 1.5(2)             | 8.33(9) | 31.7(3)           | 0.10(3) | 11.0(3)      |         |         | 0.8(1)         |             |            | 9.2(3)   |           |          |           |            | 2.8(2)       | 1.99 | 0.33 |
| HT[P]_900   | 15.9(8)   | 3.4(2)             | 9.7(2)              | 1.8(1)             | 5.69(6) | 11.5(1)           |         | 10.9(3)      |         |         | 2.29(7)        | 0.26(9)     | 0.29(8)    | 30.9(3)  |           |          |           | 1.7(2)     | 3.9(1)       | 1.45 | 0.54 |
| HT[P]_950   | 17.8(8)   | 47.4(4)            | 2.6(2)              | 1.0(1)             | 2.89(4) |                   | 0.70(3) | 10.6(2)      |         |         | 3.13(8)        | 0.4(1)      |            | 10.2(2)  |           |          |           | 1.2(1)     | 1.3(1)       | 1.49 | 0.51 |
| HT[P]_1000  | 15.0(7)   | 63.8(5)            |                     | 0.71(9)            | 2.12(4) |                   | 0.17(5) |              |         | 9.9(1)  | 3.90(9)        | 0.7(1)      | 0.12(7)    | 0.5(1)   |           | 0.06(5)  |           | 0.5(1)     | 0.6(1)       | 1.67 | 0.46 |
| HT[P]_1050  | 16.1(6)   | 55.2(4)            |                     | 0.60(9)            | 1.38(5) |                   | 0.08(2) |              |         | 9.8(1)  | 3.95(7)        | 0.29(9)     | 0.30(8)    | 0.5(1)   |           | 0.26(5)  | 7.3(1)    | 0.6(1)     | 2.0(1)       | 1.54 | 0.50 |
| HT[P]_1100  | 29.3(5)   | 42.1(3)            |                     | 0.67(8)            | 0.14(2) |                   | 0.15(3) |              |         | 8.3(1)  | 0.56(6)        | 0.77(8)     | 0.21(7)    | 0.27(8)  | 7.8(1)    | 7.1(1)   | 1.0(1)    |            | 0.11(3)      | 1.52 | 0.58 |
| HT[D2]_700  | 15.7(8)   | 4.1(2)             | 7.0(2)              | 0.50(9)            | 8.80(7) | 21.0(2)           | 0.12(4) | 26.7(3)      |         |         | 0.79(7)        |             | 0.38(9)    | 11.3(2)  |           | 0.13(5)  |           | 1.2(1)     | 0.68(9)      | 1.96 | 0.36 |
| HT[D2]_800  | 8.6(7)    | 25.7(2)            | 2.7(2)              | 0.52(7)            | 6.80(6) | 4.52(6)           | 0.22(5) | 23.1(2)      | 5.3(2)  |         | 3.03(8)        | 1.8(1)      | 0.32(8)    | 15.0(2)  |           | 0.06(5)  |           |            | 0.25(8)      | 1.93 | 0.35 |
| HT[D2]_900  | 12.3(8)   | 45.5(4)            |                     | 0.36(6)            | 5.63(6) | 0.08(4)           | 1.81(3) | 13.6(3)      | 10.6(2) |         | 3.59(8)        | 2.5(1)      | 1.2(1)     |          |           | 0.25(6)  |           | 0.14(8)    | 0.10(6)      | 2.00 | 0.32 |
| HT[D2]_1000 | 14.6(9)   | 48.4(3)            |                     | 0.30(6)            | 3.84(5) |                   | 2.45(4) |              |         | 19.6(2) | 2.63(7)        | 0.7(1)      | 4.6(1)     |          |           | 0.06(5)  |           | 0.40(8)    | 0.5(1)       | 1.73 | 0.44 |
| HT[D2]_1100 | 12(1)     | 48.2(4)            |                     | 0.6(1)             | 3.61(7) | 0.17(7)           | 0.11(3) |              |         | 18.4(2) | 3.23(8)        | 0.9(1)      | 7.4(2)     |          | 0.6(2)    | 0.23(6)  |           | 0.4(1)     | 0.6(1)       | 1.62 | 0.51 |
| HT[D2]_1200 | 16.7(8)   | 43.7(3)            |                     | 0.7(1)             | 1.01(5) | 0.04(3)           | 0.14(3) |              |         | 17.3(2) | 2.80(6)        | 0.07(6)     | 10.0(2)    |          |           | 1.1(1)   | 3.5(1)    |            | 1.1(1)       | 1.55 | 0.54 |

**Table S2.** Lattice parameters and site occupancies determined for ellestadite in sample mixtures D2 and P heated to 700-1200 °C. Cl<sub>calc</sub>=chlorine content calculated from crystalline phase contents (ellestadite composition was considered in the calculation); Cl<sub>I-IC</sub>=chlorine content determined by combustion-ion chromatography.

| Name        | Ellestadite monoclinic |           |           |            |           |               |               |                 |                 |                 | Ellestadite hexagonal |           |           |                 |                 |                 | Cl <sub>calc</sub> | Cl <sub>I-IC</sub> |
|-------------|------------------------|-----------|-----------|------------|-----------|---------------|---------------|-----------------|-----------------|-----------------|-----------------------|-----------|-----------|-----------------|-----------------|-----------------|--------------------|--------------------|
|             | a                      | b         | c         | β          | V         | SOF S1<br>(S) | SOF S2<br>(S) | SOF Ca3<br>(Ca) | SOF O13<br>(Cl) | SOF Cl1<br>(Cl) | a                     | c         | V         | SOF Ca1<br>(Ca) | SOF Ca2<br>(Ca) | SOF Cl1<br>(Cl) |                    |                    |
| HT[D2]_800  | 9.5690(8)              | 9.5372(7) | 6.9201(3) | 119.957(6) | 547.16(7) | 0.27(2)       | 0.34(2)       | 0.57(4)         | 0               | 0.16(5)         |                       |           |           |                 |                 |                 | 0.95               | 1.29               |
| HT[D2]_900  | 9.5548(5)              | 9.5345(4) | 6.9243(2) | 120.043(4) | 546.06(5) | 0.41(2)       | 0.42(2)       | 0.65(3)         | 0.16(4)         | 0.16(5)         | 9.5927(6)             | 6.9008(7) | 549.94(8) | 1.0(2)          | 1.0(1)          | 0.48(5)         | 1.73               | 1.39               |
| HT[D2]_950  | 9.5699(9)              | 9.551(1)  | 6.9085(4) | 119.970(8) | 547.01(9) | 0.44(5)       | 0.47(5)       | 0.66(2)         | 0.18(4)         | 0.16(5)         | 9.6056(5)             | 6.8898(4) | 550.54(6) | 0.99(1)         | 0.993(7)        | 0.45(3)         | 1.46               | 1.40               |
| HT[D2]_1000 |                        |           |           |            |           |               |               |                 |                 |                 | 9.6273(2)             | 6.8758(2) | 551.90(2) | 0.983(4)        | 0.992(2)        | 0.44(1)         | 1.56               | 1.35               |
| HT[D2]_1050 |                        |           |           |            |           |               |               |                 |                 |                 | 9.6358(2)             | 6.8714(2) | 552.52(3) | 0.978(5)        | 0.996(3)        | 0.44(1)         | 1.46               | 1.29               |
| HT[D2]_1100 |                        |           |           |            |           |               |               |                 |                 |                 | 9.6350(2)             | 6.8730(2) | 552.56(3) | 1.000(6)        | 0.987(3)        | 0.46(1)         | 1.45               | 1.21               |
| HT[P]_700   | 9.579(2)               | 9.538(2)  | 6.913(1)  | 120.00(1)  | 547.0(2)  | 0             | 0.38(5)       | 0.6(1)          | 0               | 0               |                       |           |           |                 |                 |                 | 0.72               | 1.28               |
| HT[P]_800   | 9.575(1)               | 9.552(2)  | 6.9122(6) | 119.94(1)  | 547.8(2)  | 0             | 0.39(4)       | 0.49(8)         | 0               | 0               |                       |           |           |                 |                 |                 | 0.66               | 1.34               |
| HT[P]_900   | 9.602(1)               | 9.564(2)  | 6.898(4)  | 119.95(1)  | 548.8(2)  | 1.00(4)       | 0.33(4)       | 0.57(7)         | 0               | 0.2(1)          |                       |           |           |                 |                 |                 | 0.71               | 1.40               |
| HT[P]_1000  |                        |           |           |            |           |               |               |                 |                 |                 | 9.6432(3)             | 6.8674(3) | 553.05(4) | 1.000(9)        | 0.996(5)        | 0.49(2)         | 1.22               | 1.29               |
| HT[P]_1100  |                        |           |           |            |           |               |               |                 |                 |                 | 9.6386(2)             | 6.8701(3) | 552.74(3) | 1.000(9)        | 0.994(4)        | 0.48(2)         | 1.20               | 1.09               |
| HT[P]_1200  |                        |           |           |            |           |               |               |                 |                 |                 | 9.6226(3)             | 6.8873(3) | 552.29(5) | 0.99(1)         | 1.000(5)        | 0.48(2)         | 0.82               | 0.52               |
